# Supplementary material
Source: publisher figshare collection journal article supplement (https://frontiersin.figshare.com/ndownloader/files/20152901)
Supplement: Supplementary file 1 [file 20152901]

**Supplementary Materials**


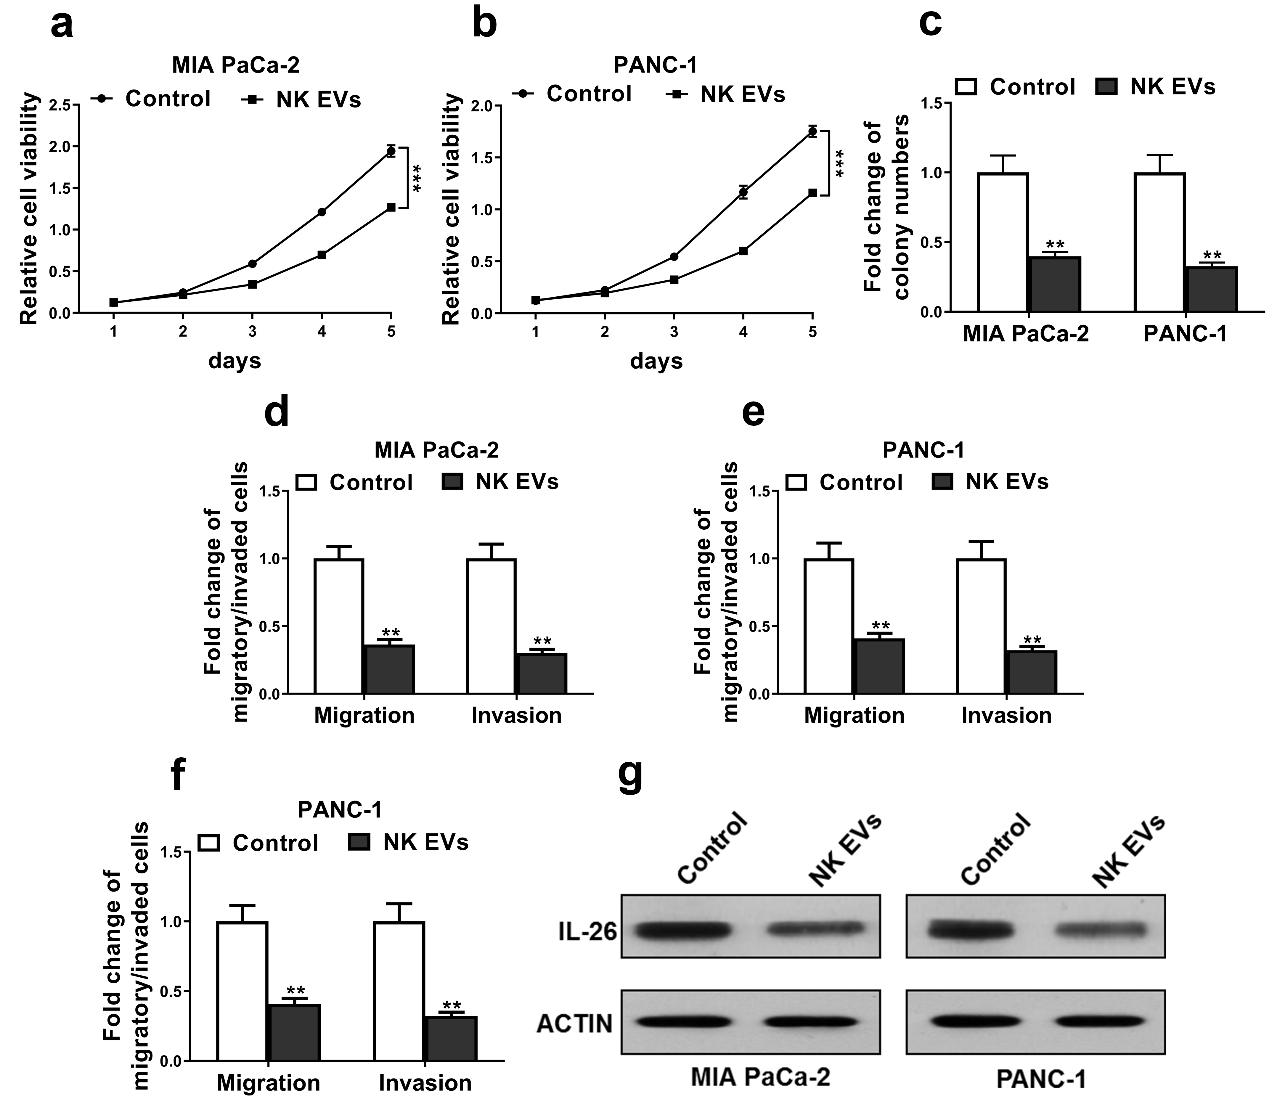


Figure S1. NK cells extracelluar vesicles (NK EVs) treatment inhibited cell viability, proliferation, migration and inhibited IL-26 production of Mia PaCa-2 and PANC-1. (a and b) CCK-8 assay showed cell viability of Mia PaCa-2 and PANC-1 cells treated with NK EVs or negative control (Control). (c) Colony formation assay showed cell proliferation of Mia PaCa-2 and PANC-1 cells treated with NK EVs or negative control (Control). (d and e) Transwell assays showed cell migratory and invasive ability of Mia PaCa-2 and PANC-1 cells treated with NK EVs or Control. (f and g) The relative expression levels of IL-26 in Mia PaCa-2 and PANC-1 cells treated with NK EVs or Control were detected by qRT-PCR and western blot. The data represent the mean ± SD. ***P*<0.01; ****P*<0.001.
